# Supplementary material
Source: MDPI journal article supplement (https://www.mdpi.com/1999-4907/9/2/79)
Supplement: s1 [file s1]

**Table S2.** Common recovery rates of residue biomass on harvest sites.

| Source                                           | Recovery Rate, %                                |                                                  |
|--------------------------------------------------|-------------------------------------------------|--------------------------------------------------|
|                                                  | As a proportion of the total<br>harvest residue | As a proportion of merchantable<br>stand biomass |
| [1]                                              | 67                                              |                                                  |
| [2]                                              | 34–57                                           |                                                  |
| [3]                                              |                                                 | 13–39                                            |
| [4]                                              |                                                 | 15–57                                            |
| [5]                                              | 6–50                                            | 5–53                                             |
| [6]                                              | 78–85                                           |                                                  |
| [7]                                              | 43                                              |                                                  |
| Average estimate (rounded to<br>nearest integer) | 53                                              | 30                                               |

## References

1. Alam B.; Pulkki R.; Upadhyay T.; Shahi C. Modelling wood biomass procurement for bioenergy production at the Atikokan generating station in northwestern Ontario. Proceedings of the 34th Council on Forest Engineering Conference, Quebec City, Canada, June 12-15, 2011.
2. Briedis J.I.; Wilson J.S.; Benjamin J.G.; Wagner R.G. Biomass retention following whole-tree, energy wood harvests in central Maine: Adherence to five state guidelines. *Biomass Bioenergy*, **2011**, 35, 3552-3560. DOI: 10.1016/j.biombioe.2011.05.018.
3. MacDonald A.J. Producing energy chips from roadside residue using a Dynamic Cone-Head 580 chipper. FERIC Advantage Report, 11, August 2009. p. 12.
4. Puttock G.D. Estimating cost for integrated harvesting and related forest management activities. *Biomass Bioenergy*, **1995**, 8, 73-79, DOI:10.1016/0961-9534(95)00001-N.
5. Ralevic P.; Ryans M.; Cormier D. Assessing forest biomass for bioenergy: Operational challenges and cost considerations. *For. Chron.*, **2010**, 86, 43-50, DOI: 10.5558/tfc86043-1.
6. Ryans M.; Desrochers L. Initial observation of the John Deere 1490D Energy Wood Harvester. FERIC Advantage Report, 7, March 2006. p. 5.
7. Volpe S. FPInterface – BiOS. FERIC Advantage Report, 13, May 2011. p. 8.
