# Supplementary material
Source: MDPI journal article supplement (https://www.mdpi.com/1999-4907/9/2/79)
Supplement: s1 [file s1]

**Supplementary S1.** Estimating the broad-scale geographic distribution of forest residue biomass and the biomass amounts potentially available for a fossil fuel substitution.

We have estimated the amount of post-harvest forest residues that can be potentially available from Canadian forests using the following two-step approach. First, we identified the potential locations where the residual biomass could be accessible after harvest within the managed forests of the country. We started with maps of merchantable forest biomass volume and age distribution for generalized conifer and hardwood tree species groups (see [1]), excluding Prince Edward Island, Yukon, Northwest Territories, Nunavut, and southern agricultural areas of Ontario, as large scale harvesting does not occur in these regions. We then estimated the harvested wood consumption volumes from the list of wood processing facilities which accept harvested wood. This dataset included 393 mills with the latest wood consumption values available [2–4] and delineated the geographical extent of potential harvest sites. The total sum of wood consumption volumes across Canada was verified against the aggregate nationwide harvest levels from the National Forestry Database ([5], using 2010 as a reference year). Locations of individual mills, their reported annual volumes of processed wood, and the map of merchantable forest biomass estimates were then used to apportion timber harvests to local forested areas. To examine the implication of larger harvest levels, we also simulated scenarios with the nationwide harvest levels set to a 20-year Canadian average (approximately 22% larger than the 2010 harvest level). Next, the entire zone of industrial forest management was apportioned among individual mills and wood processing facilities, delineating the approximate locations of the potential harvest sites that could potentially deliver biomass to co-generation facilities [see [6] for further details].

Once the geographic extent of harvesting operations was established, we used the Canadian Forest Service Forest Bioeconomic Model (CFS-FBM) to estimate the amounts of forest residues in forest ecosystem pools before and after harvest. CFS-FBM has been used in previous studies to estimate costs of biomass supply and carbon offsets [7,8] and is described in more detail there; here, we only provide details germane to this study. Biomass partitioning and tracking carbon in CFS-FBM follows the general structure of forest biomass pools in earlier version of the carbon budget model CFS-CBM [9]. The assessment of postharvest residue amounts excluded biomass in stumps, roots, and standing dead trees. The allocation of biomass into ecosystem pools was based on biomass conversion equations from [10], which predict the accumulation of biomass in live and dead organic matter pools from estimates of merchantable stand volume and forest age. CFS-FBM also simulates the transfers of organic matter between ecosystem biomass pools similar to the approach reported in [9], and [11]. We assumed that the removal of residues from the harvest site would occur within the harvest year.

At the next step, we have estimated the cost of residual biomass supply to nearest co-generation facility including two major cost components of residue supply: (1) extraction costs at the harvest and landing sites and (2) the cost of hauling the biomass to the nearest co-generation facility. Biomass extraction from harvest sites has been previously studied for general forest types in the U.S. [12–14]. Here, we assumed the extraction of biomass from roadside residue piles after clear cutting and the use of a full-tree length harvesting method. These practices are common in Canada; clear cut harvesting systems are the most commonly implemented (approximately 93% [15]) and approximately 90% of harvest operations in Canada use the full tree to roadside system [16] in which trees are harvested and skidded to the landing site where trees are cut to specified dimensions and the non-merchantable portion is left to decay. Our analysis does not include harvest residues left on the harvest site itself (such as techniques described in [17] or [18]); the extraction of this type of biomass requires costly specialized equipment [19]. We also eliminated standing deadwood from our estimates of residual biomass supply, as standing dead trees are commonly required by provincial guidelines to remain on harvest sites for ecological reasons [20–22].

We have estimated residue extraction (including chipping) costs to be \$52 ODT<sup>-1</sup> based on data from [23–25]. Extraction costs vary, depending on the type of machinery used, the processes involved, and the availability of personnel. Transportation cost estimates were based on the current road network and the locations of existing co-generation facilities in 2011. Information on the 89 cogeneration facilities across Canada used for this analysis is from the Canadian Industrial Energy End-Use Data and Analysis Centre data (CIEEDAC) [26]. We estimated the cost of transporting the biomass from each potential forest site to the nearest co-generation facility based on the transportation unit cost available from Forrester et al. [27]. Forrester et al. assessed fiber and biomass harvest transportation operations across Canada, and concluded separate prices for western and eastern provinces. Western provincial transportation costs (British Columbia, Alberta, Saskatchewan, and Manitoba) were estimated to be \$0.33 ODT<sup>-1</sup> km<sup>-1</sup> and eastern transportation costs (Ontario, Quebec, New Brunswick, Nova Scotia, and Newfoundland) were estimated at \$0.22 ODT<sup>-1</sup> km<sup>-1</sup>. An abundance of high-slope roads in the Canadian Rockies in western Canada explains the cost differences between eastern and western provinces. For each potential harvest site, the aggregated cost of biomass supply was estimated as a sum of on-site extraction and distance-dependent transportation costs.

## References

1. Yemshanov D.; McKenney D.W.; Pedlar J.H. Mapping forest composition from the Canadian National Forest Inventory and land cover classification maps. *Environ Monit Assess*, **2012**, *184*, 4655–4669, DOI: 10.1007/s10661-011-2293-2.
2. Spelter H.; McKeever D.; Toth D. Profile 2009: softwood sawmills in the United States and Canada. USDA Forest Service, Forest Products Laboratory; 2009. p. 55. Available online: <<https://www.fs.usda.gov/treearch/pubs/34525>> [accessed 30 May 2013].
3. Nylander M.; Friberg M. The Sawmill database. 2011. Available online: <[www.sawmilldatabase.com](http://www.sawmilldatabase.com)> [accessed 27 January 2014].
4. Environmental Paper Network. Pulpwatch. 2012. Available online: <<http://pw.environmentalpaper.org/>> [accessed 16 June 2014].
5. Canadian Council of Forest Ministers (CCFM). Forest Products – Quick Facts. 2013. Available online: <[http://nfdp.ccfm.org/products/quick\\_facts\\_e.php](http://nfdp.ccfm.org/products/quick_facts_e.php)> [accessed 10 April 2014].
6. Yemshanov D.; McKenney D.W.; Fraleigh S.; D'Eon S. An integrated spatial assessment of the investment potential of three species in southern Ontario, Canada inclusive of carbon benefits. *Forest Policy and Economics*, **2007**, *10*, 48–59, DOI:10.1016/j.forpol.2007.03.001.
7. Yemshanov D.; McKenney D.W.; Fraleigh S.; McConkey B.; Huffman T.; Smith S. Cost estimates of post harvest forest biomass supply for Canada. *Biomass Bioenergy*, **2014**, *69*, 80–94, DOI:10.1016/j.biombioe.2014.07.002.
8. Yemshanov D.; Biggs J.; McKenney D.W.; Lempriere T. Effects of permanence requirements on afforestation choices for carbon sequestration for Ontario, Canada. *Forest Policy and Economics*, **2012**, *14*, 6–18, DOI:10.1016/j.forpol.2011.08.010.
9. Kurz W.A.; Apps M.J. A 70-year retrospective analysis of carbon fluxes in the Canadian forest sector. *Ecol. Appl.*, **1999**, *9*, 526–47.
10. Boudewyn P.; Song X.; Magnussen S.; Gillis M.D. Model-based, volume-to-biomass conversion for forested and vegetated land in Canada. 2007. p. 112. Available online: <<https://cfs.nrcan.gc.ca/publications?id=27434>> [accessed 18 May 2013]
11. Kurz W.A.; Apps M.J.; Webb T.M.; McNamee P.J. The carbon budget of the Canadian forest sector: Phase 1. 1992. Available online: <<http://cfs.nrcan.gc.ca/publications/?id=11881>> [accessed 26 August 2013].
12. Foulgar A.N.; Harris J. Volume of wood, bark, and needles after clear cutting a lodgepole pine stand. *J. For.*, **1973**, *71*, 93–95.

13. Benson R.E.; Johnston C.M. Logging residues under different stand and harvesting conditions, Rocky Mountains. USDA Forest Service Intermountain Forest and Range Experiment Station; 1976. p. 15. Available online: <<https://www.fs.usda.gov/treearch/pubs/39715>> [accessed 20 July 2013].
14. Benson R.E.; Schlieter J.A. Logging residues in principal forest types of the northern Rocky Mountains. USDA Forest Service Intermountain Forest and Range Experiment Station; 1980. p.14. Available online: <<https://www.fs.usda.gov/treearch/pubs/39805>> [accessed 12 September 2013].
15. The Conference Board of Canada (CBC). Use of Forest Resources. 2013. Available online: <<http://www.conferenceboard.ca/hcp/details/environment/use-of-forest-resources.aspx>> [accessed 14 March 2014].
16. Bradley D. Canada - sustainable forest biomass supply chains, a report for IEA Bioenergy Task 40. Climate Change Solutions; 2007. p. 31. Available online: <<https://www.climatechangesolutions.net/copy-of-publications>> [accessed 25 August 2013].
17. Johansson J.; Liss J-E.; Gullberg T.; Björheden R. Transport and handling of forest energy bundles—advantages and problems. *Biomass Bioenergy*, **2006**, *30*, 334-341, DOI:10.1016/j.biombioe.2005.07.012.
18. Tahvanainen T.; Anttila P. Supply chain cost analysis of long-distance transportation of energy wood in Finland. *Biomass Bioenergy*, **2011**, *35*, 3360-3375, DOI:10.1016/j.biombioe.2010.11.014.
19. Ryans M.; Desrochers L. Initial observation of the John Deere 1490D Energy Wood Harvester. FP Innovations; 2006.
20. Watt R.W.; Caceres M.C. Managing for snags in the boreal forests of northeastern Ontario. Ontario Ministry of Natural Resources; 1999. p. 20.
21. Nova Scotia Department of Natural Resources. Wildlife Habitat and Watercourses Protection Regulations. 2002. Available online: <<http://www.gov.ns.ca/just/regulations/regs/fowhwp.htm>> [accessed 3 March 2014].
22. Alberta, Environment and Sustainable Resource Development (ESRD). C5 Forest Management Plan 2006-2026. 2010. p. 221. Available online: <[http://www1.agric.gov.ab.ca/\\$department/deptdocs.nsf/all/formain15761/\\$file/FMU-C5-FMP.pdf?OpenElement](http://www1.agric.gov.ab.ca/$department/deptdocs.nsf/all/formain15761/$file/FMU-C5-FMP.pdf?OpenElement)> [accessed 3 July 2013].
23. McCallum B. Woodchip supply system options for remote communities. 1999. p. 18. Available online: <<http://cfs.nrcan.gc.ca/publications?id=9137>> [accessed 28 April 2013].
24. MacDonald A.J. Producing energy chips from roadside residue using a Dynamic Cone-Head 580 chipper. FP Innovations; 2009.
25. Pelkki M.H. Technological trends and production costs for forestry byproducts. Proceedings of the Transition to a Bio Economy - The Role of Extension in Energy Conference, Arkansas, USA, June 30 – July 1, 2009.
26. Canadian Industrial Energy End-Use Data and Analysis Centre (CIEEDAC). CIEEDAC Database on Energy, Production and Intensity Indicators for Canadian Industry. 2011. Available online: <<http://www3.cieedac.sfu.ca/CIEEDACweb/mod.php?mod=NAICS&Public&menu=1602>> [accessed 30 June 2014].
27. Forrester P.D.; Sauder E.A.; Desrochers L.; Ryans M. Cost structure of hog fuel transportation in Canada. FP Innovations; 2006.
